# Supplementary material for: Excellent self-healing and antifogging coatings based on polyvinyl alcohol/hydrolyzed poly(styrene-co-maleic anhydride)
Source: Springer Nature journal article supplement (doi:10.1007/s10853-018-03279-6), 2019-01-02
Supplement: MOESM1 [file 16371562]

**Supporting Information**

**Excellent Self-healing and Antifogging Coatings Based on Polyvinyl Alcohol/ Hydrolyzed Poly(Styrene-co-Maleic Anhydride)**

Shuai Luo1, Xuan Qiao1, Qiu-Yu Wang1, Yun-Fei Zhang1, Ping Fu, Zhi-Dong Lin, Fei-Peng Du1*, Chun Cheng2

1. School of Materials Science and Engineering, Wuhan Institute of Technology, Wuhan, 430074, China

2. Department of Materials Science and Engineering, Southern University of Science and Technology, Shenzhen, 518055, China

Corresponding author: F.P. Du (hsdfp@163.com)

**
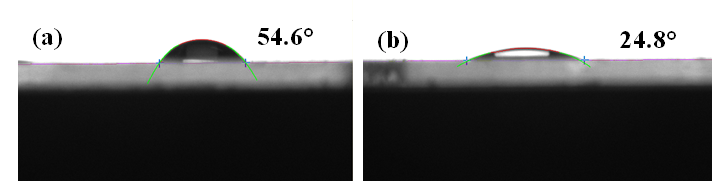
**

**Fig.S1.** The images of the WCA on a PVA film: (a) after annealing and (b) before annealing.

**
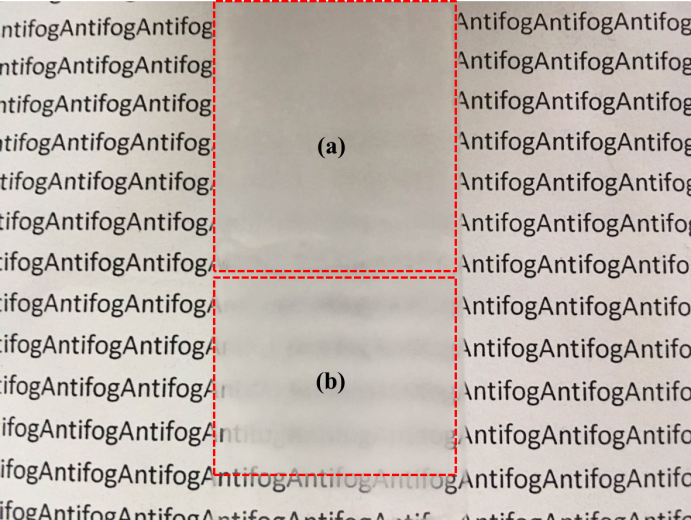
**

**Fig.S2.** Fogging on (a) a pure glass slide, and (b) a slide coated with PVA/H-PSMA. The slides unsealed were placed in a refrigerator at -20 °C with 100% RH and subsequently transferred into air at room temperature.
